# Supplementary material for: Enhanced Recovery Programs in an Ambulatory Surgical Oncology Center
Source: PubMed Central journal article supplement — Anesth Analg. 2021 Nov 15;133(6):1391–401. doi: 10.1213/ANE.0000000000005356 (PMC8568332; doi:10.1213/ane.0000000000005356), 2021-11-15
Supplement: ane-133-1391-s001.pdf [file ane-133-1391-s001.pdf]

# Supplemental Figure 1. MSK PONV Antiemetic Guideline.

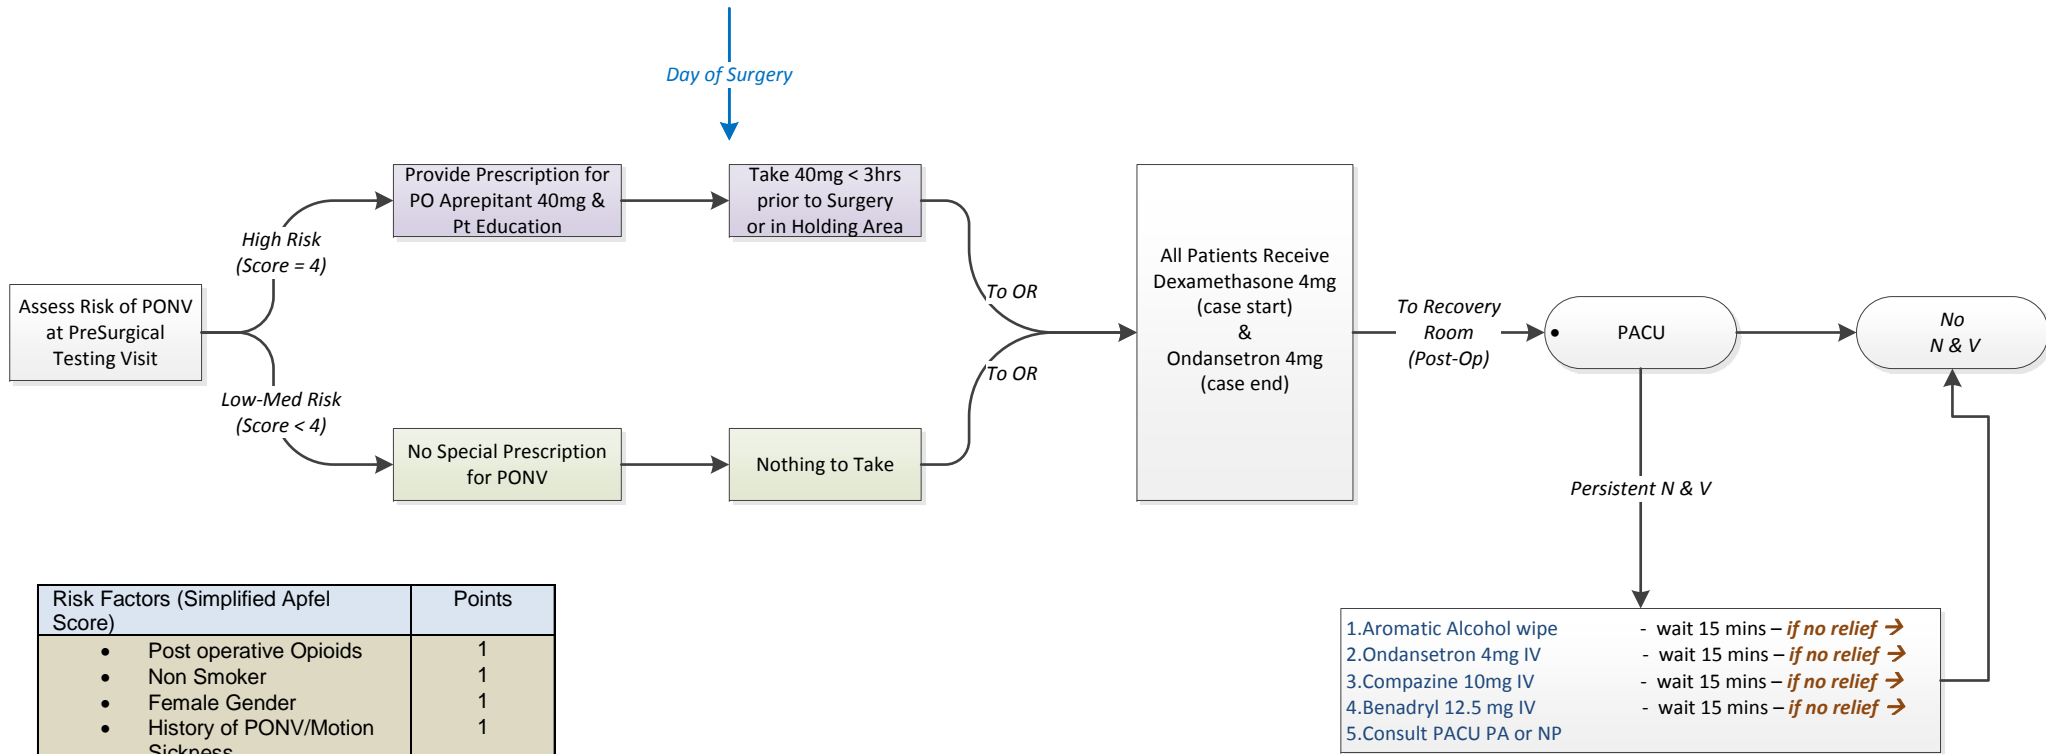

| Risk Factors (Simplified Apfel Score) | Points |
|---------------------------------------|--------|
| • Post operative Opioids              | 1      |
| • Non Smoker                          | 1      |
| • Female Gender                       | 1      |
| • History of PONV/Motion Sickness     | 1      |
| Risk score = sum                      | 0..4   |

MSK, Memorial Sloan Kettering Cancer Center; PONV, postoperative nausea and vomiting.

# Supplemental Figure 2. Discharge Scoring Tool

## MSK Post-Anesthetic Discharge Scoring Tool (Adult)

### **LEVEL OF CONSCIOUSNESS:**

- 2 = Awake , easily arousable
- 1 = frequently drowsy, drifts to sleep, but arousable to stimuli
- 0 = Minimal or no response to stimuli

### **OXYGEN SATURATION:**

- 2 = O2 Sat  $\geq$  92% on room air
- 1 = O2 Sat  $\geq$  92% with Nasal Canula, BiPAP, Blow-by, CPAP, Face tent, RSV hood, or Trach collar regardless of amount of oxygen delivery requirement
- 0 = O2 Sat  $<$  92% or any patient on simple facemask, high flow facemask, heliox, t-piece, Opti-flow, non-rebreather, or mechanical assistance

### **HEMODYNAMIC STABILITY:**

- 2 = baseline SBP + / - 10 mmHg
- 1 = baseline SBP + / - 11 to 30 mmHg
- 0 = baseline SBP + / -  $>$ 30 mmHg

### **POST-OPERATIVE /PROCEDURE PAIN:**

*Numeric or Wong Baker pain scale*

- 2 = acceptable pain level
- 0 = unacceptable pain level

*If FLACC or CPOT scale*

- 2 = score of 0-2
- 1 = score of 3-6
- 0 = score of 7 or greater

### **NAUSEA/VOMITING:**

- 2 = none or mild nausea with no active vomiting
- 1 = none or mild nausea with vomiting; moderate nausea with no vomiting
- 0 = moderate nausea with vomiting; Severe nausea with or without vomiting; Or unable to assess nausea.

# Supplemental Figure 3. Compliance rates with each ERAS measure by quarter.

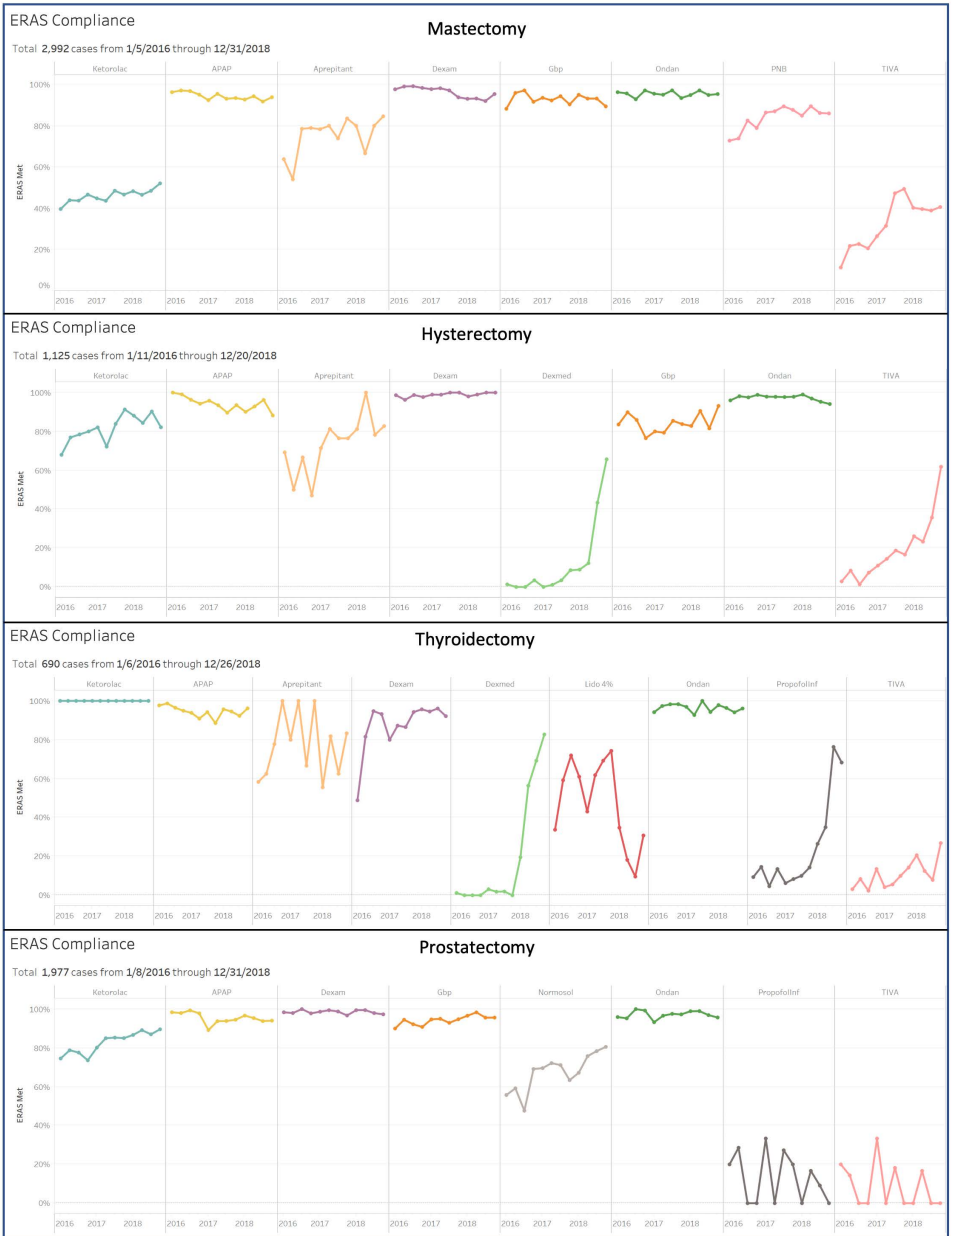

Examples of interactive, real-time compliance dashboards for each procedure over the study period. Dashboard filters (not shown) permit selection of a number of criteria, including time period, surgical service, procedures, patient class, surgery location, and outcome parameters of interest. Proportion of eligible cases which achieved the given ERAS measure within each quarter are presented. Note, case numbers by procedure vary from Table 2 because of slight differences in procedure identification queries used and due to inclusion of patients with multiple procedures in dashboard that were excluded from primary analysis. APAP, Acetaminophen. Dexam, dexamethasone. Gbp, gabapentin. Ondans, ondansetron. PNB, peripheral nerve block. TIVA, total intravenous anesthesia. Dexmed, dexmedetomidine. Lido 4%, 4% lidocaine, Propofolinf, Propofol Infusion. ERAS, enhanced recovery after surgery.

**Supplemental Table 1. Compliance rates by surgical procedure.** Average compliance over the study period. Patients were excluded if they had clinical contraindications or refused the intervention. Data presented as n (%).

| <b>Characteristic</b>     | <b>Mastectomy,<br/>n = 2965</b> | <b>Minimally<br/>invasive<br/>hysterectomy,<br/>n = 1099</b> | <b>Thyroidectomy,<br/>n = 680</b> | <b>Minimally<br/>invasive<br/>prostatectomy,<br/>n = 1976</b> |
|---------------------------|---------------------------------|--------------------------------------------------------------|-----------------------------------|---------------------------------------------------------------|
| Preoperative aprepitant   | 443 (76%)                       | 153 (74%)                                                    | 72 (75%)                          |                                                               |
| Preoperative gabapentin   | 2262 (93%)                      | 674 (84%)                                                    | <i>n/a</i>                        | 1128 (93%)                                                    |
| Excluded                  | 528                             | 299                                                          |                                   | 769                                                           |
| Paravertebral nerve block | 1871 (84%)                      | <i>n/a</i>                                                   | <i>n/a</i>                        | <i>n/a</i>                                                    |
| Excluded                  | 742                             |                                                              |                                   |                                                               |
| Dexamethasone             | 2841 (96%)                      | 1086 (99%)                                                   | 577 (85%)                         | 1946 (98%)                                                    |
| Excluded                  | 6                               | 0                                                            | 2                                 | 0                                                             |
| Ondansetron               | 2824 (95%)                      | 1070 (97%)                                                   | 653 (96%)                         | 1920 (97%)                                                    |
| Excluded                  | 6                               | 0                                                            | 2                                 | 0                                                             |
| Acetaminophen             | 2797 (94%)                      | 1036 (94%)                                                   | 647 (95%)                         | 1881 (95%)                                                    |
| Ketorolac                 | 1357 (46%)                      | 891 (82%)                                                    | <i>n/a</i>                        | 1502 (83%)                                                    |
| Excluded                  | 29                              | 17                                                           |                                   | 174                                                           |
| Lidocaine                 | <i>n/a</i>                      | <i>n/a</i>                                                   | 315 (46%)                         | <i>n/a</i>                                                    |
| Excluded                  |                                 |                                                              | 0                                 |                                                               |

**Supplemental Table 2. Quality indicators by surgical procedure.** Data are presented as median (interquartile range) or n (%).

| <b>Characteristic</b>            | <b>Mastectomy,<br/>n = 2965</b> | <b>Minimally invasive<br/>hysterectomy,<br/>n = 1099</b> | <b>Thyroidectomy,<br/>n = 680</b> | <b>Minimally invasive<br/>prostatectomy,<br/>n = 1976</b> |
|----------------------------------|---------------------------------|----------------------------------------------------------|-----------------------------------|-----------------------------------------------------------|
| Time to first ambulation (h)     | 5.7 (4.4, 9.0)                  | 5.1 (4.0, 6.5)                                           | 5.1 (3.6, 7.1)                    | 5.3 (4.4, 6.5)                                            |
| Unknown                          | 1183                            | 473                                                      | 321                               | 690                                                       |
| PACU length of stay (h)          | 19.5 (17.5, 21.7)               | 17.6 (7.8, 20.8)                                         | 19.6 (17.1, 21.5)                 | 20.0 (17.4, 21.7)                                         |
| Reoperation                      | 95 (3.2%)                       | 1 (< 0.1%)                                               | 3 (0.4%)                          | 1 (< 0.1%)                                                |
| Transferred to hospital          | 52 (1.8%)                       | 13 (1.2%)                                                | 10 (1.5%)                         | 32 (1.6%)                                                 |
| Readmitted within 30 days        | 94 (3.2%)                       | 31 (2.8%)                                                | 6 (0.9%)                          | 43 (2.2%)                                                 |
| Urgent care visit within 30 days | 201 (6.8%)                      | 85 (7.7%)                                                | 21 (3.1%)                         | 150 (7.6%)                                                |

PACU, post-anesthesia care unit.
